# Supplementary material
Source: Springer Nature journal article supplement (https://www.springermedizin.de/resource/supplementary/12939_2008_126_MOESM2_ESM.pdf/9551542)

## Age at first pregnancy

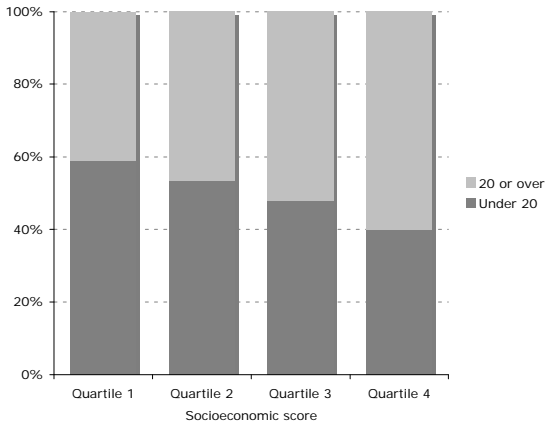

## Site of antenatal care

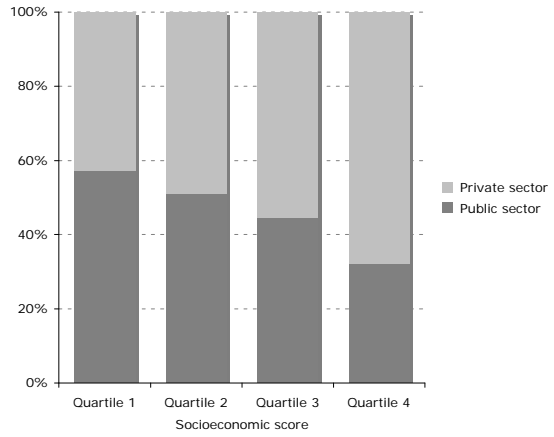

## Literacy

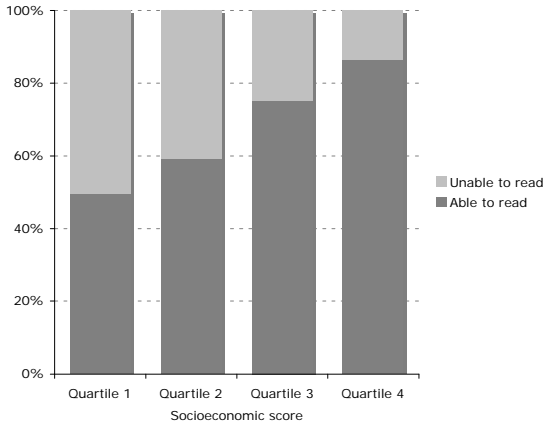

## Site of delivery

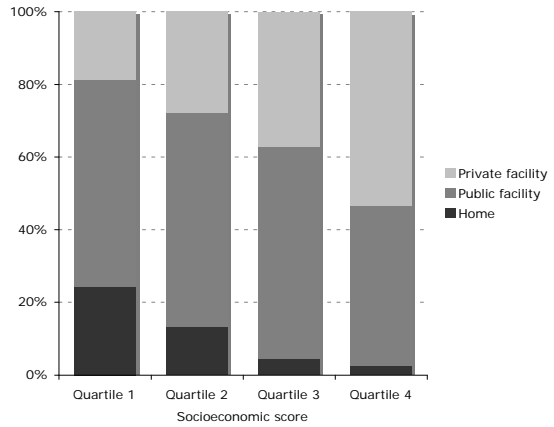

## Household access to water

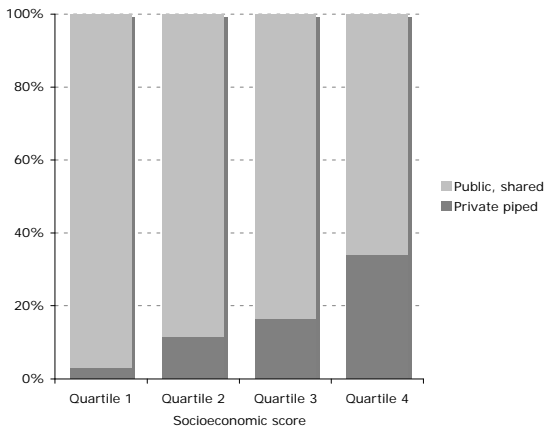

## Site of postnatal care

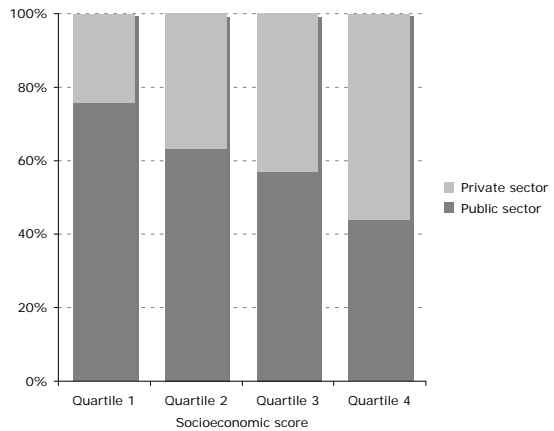

Supplement: MOESM2 [file 9551542]
